# Supplementary material
Source: PubMed Central journal article supplement (PMC3194097)

Supplementary Figure 1A and 1B

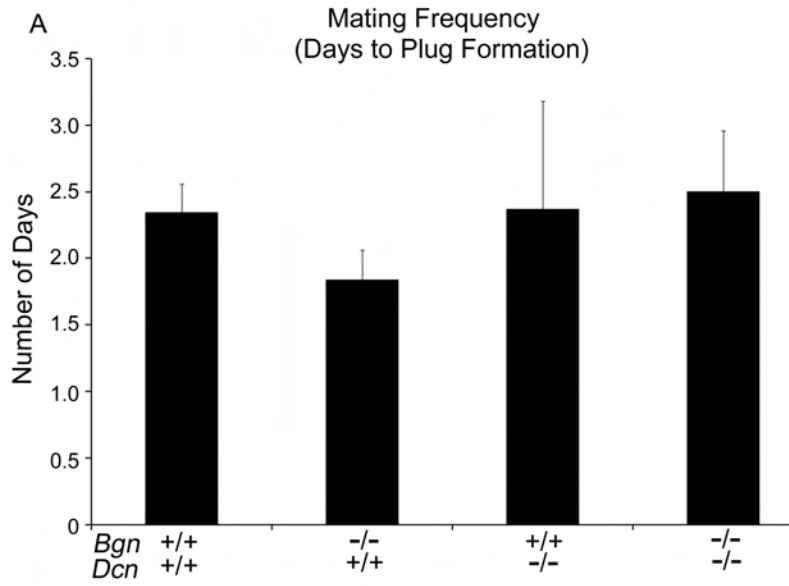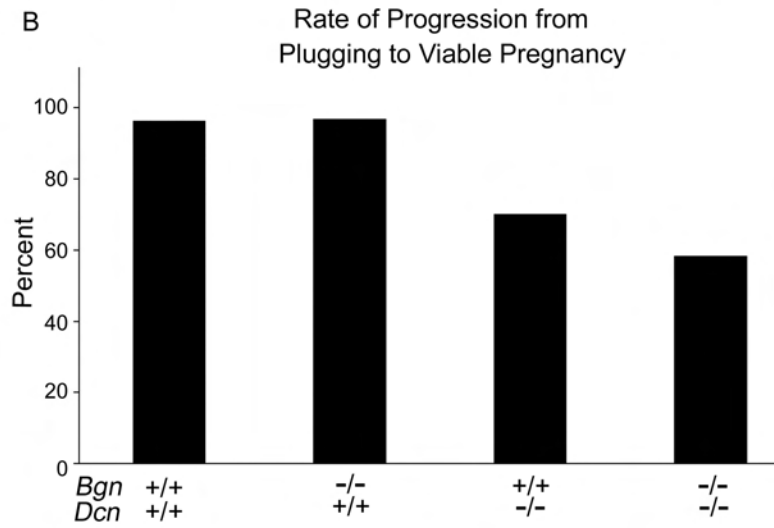

Supplement: NIHMS329110-supplement-1.pdf [file NIHMS329110-supplement-1.pdf]
